# Supplementary material for: Assessing the household economic burden of non-communicable diseases in India: evidence from repeated cross-sectional surveys
Source: Springer Nature journal article supplement (doi:10.1186/s12889-021-10828-3), 2021-05-07

## **APPENDIX**

**Table 1 : State-Wise Estimates for Incidence of Catastrophic Health Expenditure on Treatment of Non-Communicable Diseases in 2014**

| State                      | Households incurring Catastrophic health expenditure |               | Mean household monthly consumption expenditure (INR) |          |          | Mean household monthly Out-of-pocket expenditure (INR) |           |          |
|----------------------------|------------------------------------------------------|---------------|------------------------------------------------------|----------|----------|--------------------------------------------------------|-----------|----------|
|                            | %                                                    | CI            | INR                                                  | LCI      | UCI      | INR                                                    | LCI       | UCI      |
| Jammu & Kashmir            | 77.9                                                 | [66.97-85.97] | 4976.275                                             | 4159.802 | 5792.747 | 2179.83                                                | 1635.516  | 2724.143 |
| Himachal Pradesh           | 71.4                                                 | [60.2-80.48]  | 5334.65                                              | 4356.199 | 6313.101 | 2227.205                                               | 1686.969  | 2767.441 |
| Punjab                     | 74.54                                                | [66.01-81.53] | 7967.3                                               | 6967.19  | 8967.41  | 2498.09                                                | 2064.591  | 2931.588 |
| Chandigarh                 | 43.5                                                 | [15.9-75.82]  | 9114.893                                             | 5985.556 | 12244.23 | 1869.227                                               | 623.0289  | 3115.425 |
| Uttarakhand                | 77.61                                                | [59.34-89.17] | 3798.508                                             | 3235.486 | 4361.529 | 3041.072                                               | 1159.239  | 4922.906 |
| Haryana                    | 65.74                                                | [54.36-75.56] | 6693.706                                             | 5598.91  | 7788.502 | 2973.294                                               | 2220.899  | 3725.688 |
| Delhi                      | 62.19                                                | [46.7-75.53]  | 10288.64                                             | 8338.205 | 12239.08 | 2908.01                                                | 2220.929  | 3595.092 |
| Rajasthan                  | 66.22                                                | [59.86-72.04] | 5291.432                                             | 4710.745 | 5872.119 | 2121.784                                               | 1653.888  | 2589.68  |
| Uttar Pradesh              | 76.68                                                | [72.5-80.4]   | 4461.839                                             | 4125.323 | 4798.354 | 2628.83                                                | 2210.148  | 3047.512 |
| Bihar                      | 74.21                                                | [64.67-81.9]  | 3273.246                                             | 3014.407 | 3532.084 | 2675.373                                               | 1508.792  | 3841.954 |
| Sikkim                     | 48.52                                                | [26.72-70.9]  | 4673.074                                             | 3547.935 | 5798.213 | 1244.965                                               | 506.4329  | 1983.497 |
| Arunachal Pradesh          | 69.99                                                | [50.82-84.03] | 2971.419                                             | 2321.11  | 3621.727 | 1265.155                                               | 731.1024  | 1799.207 |
| Nagaland                   | 39.76                                                | [20.02-63.52] | 5873.266                                             | 4994.861 | 6751.672 | 1109.359                                               | 447.1872  | 1771.531 |
| Manipur                    | 92.29                                                | [86.7-95.65]  | 3814.704                                             | 3267.27  | 4362.138 | 1811.209                                               | 1247.239  | 2375.179 |
| Mizoram                    | 41.22                                                | [25.41-59.07] | 7351.085                                             | 5953.885 | 8748.285 | 1066.526                                               | 651.0908  | 1481.962 |
| Tripura                    | 59.44                                                | [46.74-70.99] | 4060.073                                             | 3510.59  | 4609.557 | 4207.825                                               | -1129.875 | 9545.526 |
| Meghalaya                  | 44.27                                                | [22.72-68.21] | 4373.134                                             | 3746.276 | 4999.992 | 780.5476                                               | 422.5146  | 1138.581 |
| Assam                      | 73.07                                                | [61.71-82.04] | 4184.056                                             | 3278.265 | 5089.847 | 2254.041                                               | 112.508   | 4395.575 |
| West Bengal                | 69.96                                                | [65.43-74.12] | 4574.344                                             | 4220.723 | 4927.966 | 1905.387                                               | 1629.016  | 2181.757 |
| Jharkhand                  | 61.69                                                | [48.41-73.43] | 3938.37                                              | 3256.662 | 4620.079 | 1846.098                                               | 216.1834  | 3476.014 |
| Odisha                     | 84.92                                                | [79.64-89.03] | 3305.642                                             | 3018.43  | 3592.855 | 2110.88                                                | 1377.897  | 2843.863 |
| Chhattisgarh               | 79.05                                                | [65.48-88.25] | 3688.225                                             | 2723.518 | 4652.933 | 3557.401                                               | 551.0773  | 6563.725 |
| Madhya Pradesh             | 74.68                                                | [67.67-80.61] | 4076.342                                             | 3647.837 | 4504.847 | 2115.564                                               | 1762.427  | 2468.701 |
| Gujarat                    | 52.52                                                | [46.22-58.75] | 6108.612                                             | 5520.889 | 6696.334 | 1632.945                                               | 1304.933  | 1960.958 |
| Daman & Diu                | 20.68                                                | [3.72-63.72]  | 12225.22                                             | 9525.768 | 14924.66 | 1647.773                                               | -126.2468 | 3421.794 |
| Dadra & Nagar Haveli       | 25.39                                                | [12.36-45.07] | 6571.713                                             | 4704.194 | 8439.231 | 687.5409                                               | 279.8634  | 1095.219 |
| Maharashtra                | 72.11                                                | [66.98-76.72] | 5607.82                                              | 5198.632 | 6017.008 | 2359.154                                               | 2024.453  | 2693.856 |
| Andhra Pradesh (Undivided) | 66.54                                                | [61.2-71.48]  | 5240.864                                             | 4896.428 | 5585.299 | 2268.721                                               | 1869.38   | 2668.062 |
| Karnataka                  | 72.9                                                 | [65.96-78.88] | 4702.553                                             | 4323.321 | 5081.785 | 1985.087                                               | 1683.126  | 2287.047 |
| Goa                        | 68.37                                                | [52.43-80.92] | 7079.753                                             | 6173.14  | 7986.366 | 2087.889                                               | 1101.582  | 3074.196 |

|                           |       |               |          |          |          |          |           |          |
|---------------------------|-------|---------------|----------|----------|----------|----------|-----------|----------|
| Lakshadweep               | 35.94 | [17.47-59.79] | 5016.815 | 4106.994 | 5926.636 | 1362.2   | 458.9754  | 2265.425 |
| Kerala                    | 60.62 | [56.34-64.75] | 6646.088 | 6162.336 | 7129.839 | 2638.425 | 2116.029  | 3160.82  |
| Tamil Nadu                | 56.79 | [51.21-62.2]  | 5290.024 | 4918.557 | 5661.49  | 1935.895 | 1596.566  | 2275.224 |
| Puducherry                | 44.8  | [30.5-60.02]  | 6303.696 | 5164.382 | 7443.01  | 2397.37  | 791.6104  | 4003.13  |
| Andaman & Nicobar Islands | 19.8  | [8.86-38.53]  | 6847.549 | 5161.785 | 8533.313 | 3232.403 | -2080.058 | 8544.864 |

**Table 2: State-Wise Estimates for Incidence of Catastrophic Health Expenditure on Treatment of Non-Communicable Diseases in 2017-18**

|                   | Households incurring Catastrophic health expenditure |               | Mean household monthly consumption expenditure (INR) |          |          | Mean household monthly Out-of-pocket expenditure (INR) |          |          |
|-------------------|------------------------------------------------------|---------------|------------------------------------------------------|----------|----------|--------------------------------------------------------|----------|----------|
|                   | %                                                    | CI            | INR                                                  | LCI      | UCI      | INR                                                    | LCI      | UCI      |
| Jammu & Kashmir   | 50.98                                                | [43.42,58.5]  | 6679.862                                             | 6193.436 | 7166.287 | 1140.291                                               | 948.55   | 1332.033 |
| Himachal Pradesh  | 62.82                                                | [54.43,70.49] | 6593.264                                             | 6100.884 | 7085.644 | 3202.222                                               | 2131.264 | 4273.18  |
| Punjab            | 55.31                                                | [48.48,61.94] | 9693.035                                             | 8994.675 | 10391.39 | 2459.512                                               | 2064.528 | 2854.495 |
| Chandigarh        | 58.31                                                | [37.82,76.28] | 15729.1                                              | 11941.51 | 19516.68 | 4097.909                                               | 953.8036 | 7242.014 |
| Uttarakhand       | 66.39                                                | [51.5,78.61]  | 9534.863                                             | 4986.816 | 14082.91 | 2537.433                                               | 1904.567 | 3170.298 |
| Haryana           | 65.54                                                | [55.12,74.64] | 8711.875                                             | 7884.529 | 9539.22  | 2503.377                                               | 2045.594 | 2961.159 |
| Delhi             | 51.84                                                | [36.48,66.85] | 11897.09                                             | 10147.56 | 13646.61 | 2875.036                                               | 1558.759 | 4191.313 |
| Rajasthan         | 62.18                                                | [56.08,67.91] | 6681.653                                             | 6240.717 | 7122.59  | 2805.378                                               | 2106.577 | 3504.179 |
| Uttar Pradesh     | 76.36                                                | [72.48,79.85] | 5184.867                                             | 4939.211 | 5430.524 | 3161.915                                               | 2749.364 | 3574.465 |
| Bihar             | 66.59                                                | [55.37,76.2]  | 4383.306                                             | 3854.44  | 4912.171 | 1615.983                                               | 1208.376 | 2023.59  |
| Sikkim            | 56.52                                                | [40.71,71.11] | 6088.487                                             | 5610.917 | 6566.057 | 1369.143                                               | 930.2425 | 1808.044 |
| Arunachal Pradesh | 76.96                                                | [67.53,84.29] | 5278.24                                              | 4118.053 | 6438.427 | 3306.507                                               | 1872.078 | 4740.936 |
| Nagaland          | 73.89                                                | [59.35,84.57] | 7240.953                                             | 5545.636 | 8936.271 | 1527.29                                                | 1058.469 | 1996.112 |
| Manipur           | 83.44                                                | [76.95,88.38] | 5879.566                                             | 5183.679 | 6575.453 | 3431.197                                               | 2426.855 | 4435.539 |
| Mizoram           | 47.99                                                | [35.51,60.72] | 9234.147                                             | 7687.256 | 10781.04 | 1663.845                                               | 1174.414 | 2153.276 |
| Tripura           | 60.72                                                | [52.24,68.59] | 6178.453                                             | 5496.232 | 6860.674 | 3390.702                                               | 1347.451 | 5433.952 |
| Meghalaya         | 18.15                                                | [12,26.51]    | 6885.259                                             | 6119.432 | 7651.085 | 765.6112                                               | 438.9872 | 1092.235 |

|                            |       |               |          |          |          |          |          |          |
|----------------------------|-------|---------------|----------|----------|----------|----------|----------|----------|
| Assam                      | 65.49 | [55.52,74.27] | 5461.596 | 4789.602 | 6133.59  | 2784.65  | 1658.841 | 3910.459 |
| West Bengal                | 62.29 | [58.22,66.2]  | 6176.692 | 5836.6   | 6516.784 | 2067.806 | 1674.367 | 2461.246 |
| Jharkhand                  | 79.65 | [71.41,85.99] | 5238.922 | 4641.385 | 5836.46  | 2543.605 | 1940.068 | 3147.142 |
| Odisha                     | 81.15 | [75.85,85.51] | 4165.324 | 3709.251 | 4621.397 | 1670.497 | 1484.096 | 1856.898 |
| Chhattisgarh               | 63.83 | [52.35,73.92] | 4786.686 | 4122.47  | 5450.902 | 2453.375 | 1151.572 | 3755.178 |
| Madhya Pradesh             | 64.94 | [54.75,73.93] | 5936.58  | 5268.882 | 6604.278 | 2632.217 | 2070.036 | 3194.397 |
| Gujarat                    | 55.32 | [47.87,62.54] | 8691.946 | 7953.146 | 9430.746 | 1762.826 | 1522.401 | 2003.251 |
| Daman & Diu                | 94.52 | [64.03,99.41] | 7502.865 | 7192.1   | 7813.629 | 1893.124 | 1657.977 | 2128.27  |
| Dadra & Nagar Haveli       | 33.38 | [20.88,48.75] | 7096.98  | 5702.132 | 8491.829 | 1432.778 | 585.9701 | 2279.585 |
| Maharashtra                | 59.07 | [54.57,63.42] | 8725.457 | 7982.988 | 9467.927 | 2371.41  | 2133.969 | 2608.851 |
| Andhra Pradesh (Undivided) | 63.31 | [58.58,67.8]  | 6168.539 | 5762.963 | 6574.116 | 1843.764 | 1635.412 | 2052.116 |
| Karnataka                  | 71.69 | [64.92,77.6]  | 7672.076 | 6808.629 | 8535.523 | 2150.266 | 1872.328 | 2428.203 |
| Goa                        | 59.59 | [41.73,75.22] | 8500.606 | 7740.801 | 9260.411 | 1886.363 | 1223.97  | 2548.756 |
| Lakshadweep                | 24.99 | [16.46,36.05] | 8766.724 | 7677.781 | 9855.667 | 1571.259 | 783.9042 | 2358.614 |
| Kerala                     | 61.22 | [57.82,64.51] | 7829.892 | 7520.779 | 8139.004 | 2638.033 | 2292.411 | 2983.655 |
| Tamil Nadu                 | 48.17 | [43.02,53.35] | 6233.033 | 5874.765 | 6591.3   | 2024.409 | 1534.523 | 2514.294 |
| Puducherry                 | 32.81 | [17.67,52.64] | 8101.416 | 7019.396 | 9183.436 | 3045.501 | 1025.652 | 5065.35  |
| Andaman & Nicobar Islands  | 24.08 | [14.88,36.54] | 10995.2  | 9761.741 | 12228.66 | 2286.126 | 871.7809 | 3700.471 |

**Table 3: State-wise estimates of Impoverishment due to healthcare payments on Non-Communicable Diseases in 2014**

|                   | State Poverty Lines |                   | HH with NCD burden         | HH impoverished before health payments |       |       | HH impoverished after health payments |       |       | HH pushed under poverty due to OOPE |
|-------------------|---------------------|-------------------|----------------------------|----------------------------------------|-------|-------|---------------------------------------|-------|-------|-------------------------------------|
|                   | RPL – Rural (INR)   | RPL – Urban (INR) | Total Number of Households | Total                                  | Rural | Urban | Total                                 | Rural | Urban | (In %)                              |
| Jammu & Kashmir   | 1044                | 1403              | 513                        | 440                                    | 255   | 185   | 470                                   | 268   | 202   | 5.85                                |
| Himachal Pradesh  | 1067                | 1412              | 389                        | 270                                    | 219   | 51    | 317                                   | 258   | 59    | 12.08                               |
| Punjab            | 1127                | 1479              | 812                        | 494                                    | 275   | 219   | 641                                   | 357   | 284   | 18.10                               |
| Uttarakhand       | 1015                | 1408              | 202                        | 159                                    | 84    | 75    | 183                                   | 88    | 95    | 11.88                               |
| Haryana           | 1128                | 1528              | 510                        | 382                                    | 210   | 172   | 444                                   | 244   | 200   | 12.16                               |
| Rajasthan         | 1036                | 1406              | 1100                       | 887                                    | 483   | 404   | 991                                   | 544   | 447   | 9.45                                |
| Uttar Pradesh     | 890                 | 1330              | 2949                       | 2426                                   | 1496  | 930   | 2690                                  | 1649  | 1041  | 8.95                                |
| Bihar             | 971                 | 1229              | 1120                       | 1001                                   | 671   | 330   | 1070                                  | 713   | 357   | 6.16                                |
| Sikkim            | 1126                | 1543              | 145                        | 110                                    | 74    | 36    | 120                                   | 79    | 41    | 6.90                                |
| Arunachal Pradesh | 1151                | 1483              | 109                        | 102                                    | 67    | 35    | 105                                   | 68    | 37    | 2.75                                |
| Nagaland          | 1230                | 1616              | 141                        | 119                                    | 73    | 46    | 127                                   | 76    | 51    | 5.67                                |
| Manipur           | 1185                | 1562              | 281                        | 265                                    | 139   | 126   | 273                                   | 142   | 131   | 2.85                                |
| Mizoram           | 1231                | 1704              | 197                        | 144                                    | 82    | 62    | 152                                   | 86    | 66    | 4.06                                |
| Tripura           | 936                 | 1377              | 346                        | 248                                    | 140   | 108   | 279                                   | 152   | 127   | 8.96                                |
| Meghalaya         | 1111                | 1524              | 124                        | 108                                    | 64    | 44    | 115                                   | 65    | 50    | 5.65                                |
| Assam             | 1006                | 1420              | 546                        | 475                                    | 338   | 137   | 517                                   | 357   | 160   | 7.69                                |
| West Bengal       | 934                 | 1373              | 2640                       | 1973                                   | 1065  | 908   | 2270                                  | 1166  | 1104  | 11.25                               |
| Jharkhand         | 904                 | 1272              | 477                        | 399                                    | 189   | 210   | 435                                   | 201   | 234   | 7.55                                |
| Odisha            | 876                 | 1205              | 873                        | 725                                    | 508   | 217   | 804                                   | 549   | 255   | 9.05                                |
| Chhatisgarh       | 912                 | 1230              | 331                        | 276                                    | 168   | 108   | 307                                   | 176   | 131   | 9.37                                |
| Madhya Pradesh    | 942                 | 1340              | 1284                       | 1036                                   | 534   | 502   | 1163                                  | 594   | 569   | 9.89                                |
| Gujarat           | 1103                | 1507              | 1241                       | 940                                    | 527   | 413   | 1059                                  | 574   | 485   | 9.59                                |
| Maharashtra       | 1078                | 1560              | 2189                       | 1662                                   | 898   | 764   | 1899                                  | 1013  | 886   | 10.83                               |
| Andhra Pradesh    | 1032                | 1371              | 2049                       | 1428                                   | 751   | 677   | 1733                                  | 895   | 838   | 14.89                               |
| Karnataka         | 975                 | 1373              | 1409                       | 1119                                   | 596   | 523   | 1271                                  | 650   | 621   | 10.79                               |
| Goa               | 1201                | 1470              | 102                        | 65                                     | 30    | 35    | 82                                    | 40    | 42    | 16.67                               |
| Kerala            | 1054                | 1354              | 1790                       | 999                                    | 444   | 555   | 1310                                  | 609   | 701   | 17.37                               |
| Tamil Nadu        | 1082                | 1380              | 2075                       | 1369                                   | 674   | 695   | 1719                                  | 825   | 894   | 16.87                               |

**Table 4: State-wise estimates of Impoverishment due to Healthcare Payments on Non-Communicable Diseases in 2017-18**

|                   | State Poverty Lines |                   | HH with NCD burden         | HH impoverished before health payments |       |       | HH impoverished after health payments |       |       | HH pushed under poverty due to OOPE |
|-------------------|---------------------|-------------------|----------------------------|----------------------------------------|-------|-------|---------------------------------------|-------|-------|-------------------------------------|
|                   | RPL – Rural (INR)   | RPL – Urban (INR) | Total Number of Households | Total                                  | Rural | Urban | Total                                 | Rural | Urban | (In %)                              |
| Jammu & Kashmir   | 1044                | 1403              | 1232                       | 915                                    | 513   | 402   | 1008                                  | 550   | 458   | 7.55                                |
| Himachal Pradesh  | 1067                | 1412              | 885                        | 463                                    | 408   | 55    | 658                                   | 566   | 92    | 22.03                               |
| Punjab            | 1127                | 1479              | 1337                       | 657                                    | 362   | 295   | 909                                   | 510   | 399   | 18.85                               |
| Uttarakhand       | 1015                | 1408              | 410                        | 257                                    | 151   | 106   | 326                                   | 179   | 147   | 16.83                               |
| Haryana           | 1128                | 1528              | 989                        | 638                                    | 375   | 263   | 765                                   | 445   | 320   | 12.84                               |
| Rajasthan         | 1036                | 1406              | 1729                       | 1246                                   | 828   | 418   | 1448                                  | 925   | 523   | 11.68                               |
| Uttar Pradesh     | 890                 | 1330              | 3737                       | 2955                                   | 1758  | 1197  | 3338                                  | 1948  | 1390  | 10.25                               |
| Bihar             | 971                 | 1229              | 1242                       | 1085                                   | 721   | 364   | 1165                                  | 751   | 414   | 6.44                                |
| Sikkim            | 1126                | 1543              | 256                        | 194                                    | 167   | 27    | 211                                   | 179   | 32    | 6.64                                |
| Arunachal Pradesh | 1151                | 1483              | 243                        | 207                                    | 139   | 68    | 218                                   | 147   | 71    | 4.53                                |
| Nagaland          | 1230                | 1616              | 275                        | 201                                    | 131   | 70    | 224                                   | 143   | 81    | 8.36                                |
| Manipur           | 1185                | 1562              | 646                        | 571                                    | 296   | 275   | 609                                   | 310   | 299   | 5.88                                |
| Mizoram           | 1231                | 1704              | 401                        | 217                                    | 114   | 103   | 237                                   | 122   | 115   | 4.99                                |
| Tripura           | 936                 | 1377              | 498                        | 291                                    | 195   | 96    | 358                                   | 237   | 121   | 13.45                               |
| Meghalaya         | 1111                | 1524              | 192                        | 133                                    | 93    | 40    | 148                                   | 95    | 53    | 7.81                                |
| Assam             | 1006                | 1420              | 910                        | 714                                    | 519   | 195   | 806                                   | 561   | 245   | 10.11                               |
| West Bengal       | 934                 | 1373              | 3304                       | 2070                                   | 1265  | 805   | 2587                                  | 1492  | 1095  | 15.65                               |
| Jharkhand         | 904                 | 1272              | 823                        | 606                                    | 375   | 231   | 704                                   | 406   | 298   | 11.91                               |
| Odisha            | 876                 | 1205              | 1508                       | 1145                                   | 879   | 266   | 1299                                  | 962   | 337   | 10.21                               |
| Chhatisgarh       | 912                 | 1230              | 752                        | 596                                    | 384   | 212   | 666                                   | 407   | 259   | 9.31                                |
| Madhya Pradesh    | 942                 | 1340              | 1565                       | 1182                                   | 635   | 547   | 1338                                  | 700   | 638   | 9.97                                |
| Gujarat           | 1103                | 1507              | 1347                       | 828                                    | 453   | 375   | 1023                                  | 530   | 493   | 14.48                               |
| Maharashtra       | 1078                | 1560              | 3388                       | 2155                                   | 1109  | 1046  | 2606                                  | 1239  | 1367  | 13.31                               |
| Andhra Pradesh    | 1032                | 1371              | 3194                       | 1744                                   | 1142  | 602   | 2397                                  | 1513  | 884   | 20.44                               |
| Karnataka         | 975                 | 1373              | 1391                       | 840                                    | 521   | 319   | 1054                                  | 607   | 447   | 15.38                               |
| Goa               | 1201                | 1470              | 219                        | 106                                    | 35    | 71    | 136                                   | 53    | 83    | 13.70                               |
| Kerala            | 1054                | 1354              | 2875                       | 1350                                   | 676   | 674   | 1946                                  | 1042  | 904   | 20.73                               |
| Tamil Nadu        | 1082                | 1380              | 2371                       | 1335                                   | 830   | 505   | 1811                                  | 1031  | 780   | 20.08                               |

**Table 5: Incidence of Catastrophic Health Expenditure, Per capita health expenditure and State health expenditure as % of GSDP across states at various groups of Epidemiological transition level (ETL)**

|                   | <u>State/UT</u>   | <u>Incidence of CHE (2014)</u> | <u>Incidence of CHE (2017-18)</u> | <u>Per Capita Health Expenditure</u> | <u>Health Expenditure as a % of GSDP</u> |
|-------------------|-------------------|--------------------------------|-----------------------------------|--------------------------------------|------------------------------------------|
| Lowest ETL        | Assam             | 73.07                          | 65.49                             | 1546                                 | 2.21%                                    |
|                   | Bihar             | 74.21                          | 66.59                             | 491                                  | 1.33%                                    |
|                   | Chhattisgarh      | 79.05                          | 63.83                             | 1354                                 | 1.33%                                    |
|                   | Jharkhand         | 61.69                          | 79.65                             | 866                                  | 1.25%                                    |
|                   | Madhya Pradesh    | 74.68                          | 64.94                             | 716                                  | 1.04%                                    |
|                   | Odisha            | 84.92                          | 81.15                             | 927                                  | 1.19%                                    |
|                   | Rajasthan         | 66.22                          | 62.18                             | 1360                                 | 1.44%                                    |
|                   | Uttar Pradesh     | 76.68                          | 76.36                             | 733                                  | 1.42%                                    |
|                   | Meghalaya         | 44.27                          | 18.15                             | 2223                                 | 2.40%                                    |
| Lower-middle ETL  | Gujarat           | 52.52                          | 55.32                             | 1189                                 | 0.72%                                    |
|                   | Uttarakhand       | 77.61                          | 66.39                             | 1765                                 | 1.06%                                    |
|                   | Arunachal Pradesh | 69.99                          | 76.96                             | 5177                                 | 3.29%                                    |
|                   | Manipur           | 92.29                          | 83.44                             | 2061                                 | 2.79%                                    |
|                   | Mizoram           | 41.22                          | 47.99                             | 5862                                 | 4.20%                                    |
|                   | Nagaland          | 39.76                          | 73.89                             | 2450                                 | 2.97%                                    |
|                   | Sikkim            | 48.52                          | 56.52                             | 5126                                 | 1.81%                                    |
|                   | Tripura           | 59.44                          | 60.72                             | 2183                                 | 2.41%                                    |
| Higher-middle ETL | Andhra Pradesh    | 66.54                          | 63.31                             | 1013                                 | 0.82%                                    |
|                   | Delhi             | 62.19                          | 51.84                             | 1992                                 | 0.76%                                    |
|                   | Haryana           | 65.74                          | 65.54                             | 1119                                 | 0.63%                                    |

|             |                      |       |       |      |       |
|-------------|----------------------|-------|-------|------|-------|
|             | Jammu & Kashmir      | 77.9  | 50.98 | 2359 | 2.46% |
|             | Karnataka            | 72.9  | 71.69 | 1124 | 0.69% |
|             | Maharashtra          | 72.11 | 59.07 | 1011 | 0.60% |
|             | Telangana            |       |       | 1322 | 0.82% |
|             | West Bengal          | 69.96 | 62.49 | 778  | n.a.  |
|             | Andaman & Nicobar    | 19.8  | 24.08 | 6201 | 5.23% |
|             | Chandigarh           | 43.5  | 58.31 | 2224 | 1.32% |
|             | Dadra & Nagar Haveli | 25.39 | 33.38 | 2451 | n.a.  |
|             | Daman & Diu          | 20.68 | 94.52 | 2073 | n.a.  |
|             | Lakshadweep          | 35.94 | 24.99 | 6018 | n.a.  |
|             | Puducherry           | 44.8  | 32.81 | 3340 | 2.13% |
| Highest ETL | Goa                  | 68.37 | 59.59 | 3643 | 1.34% |
|             | Himachal Pradesh     | 71.4  | 62.82 | 2667 | 1.68% |
|             | Kerala               | 60.62 | 61.22 | 1463 | 0.93% |
|             | Punjab               | 74.54 | 55.31 | 1173 | 0.87% |
|             | Tamil Nadu           | 56.79 | 48.17 | 1235 | 0.74% |



**Fig 1: Rural-Urban Differences in Catastrophic Payments towards NCDs in 2014**

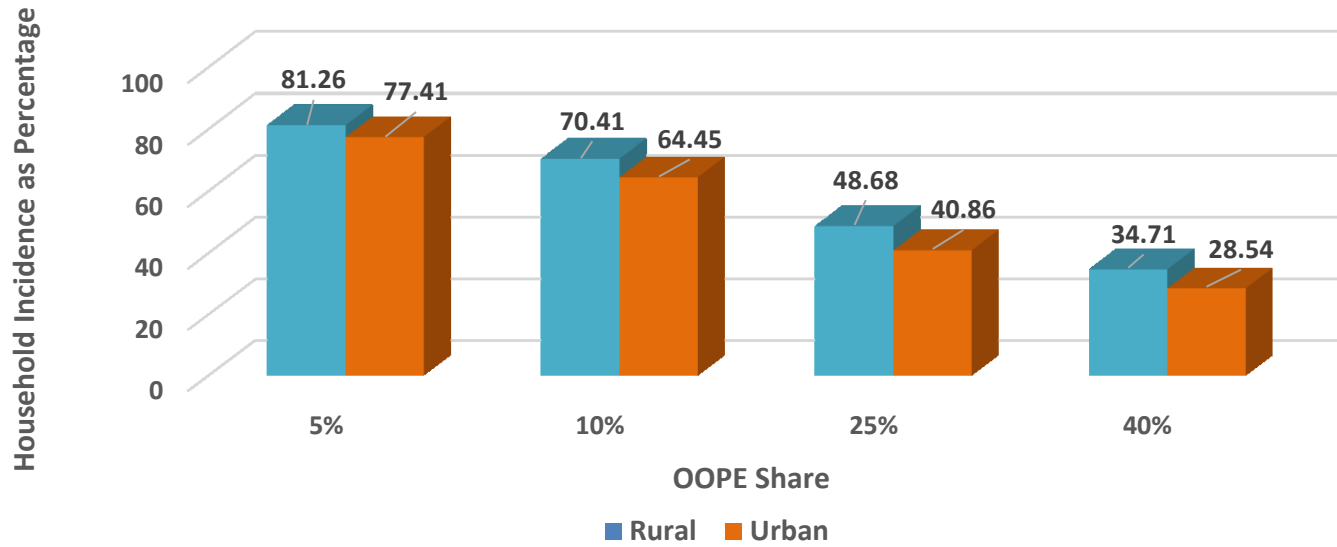

Fig 2: Rural-Urban Differences in Catastrophic Payments towards NCDs in 2017-18

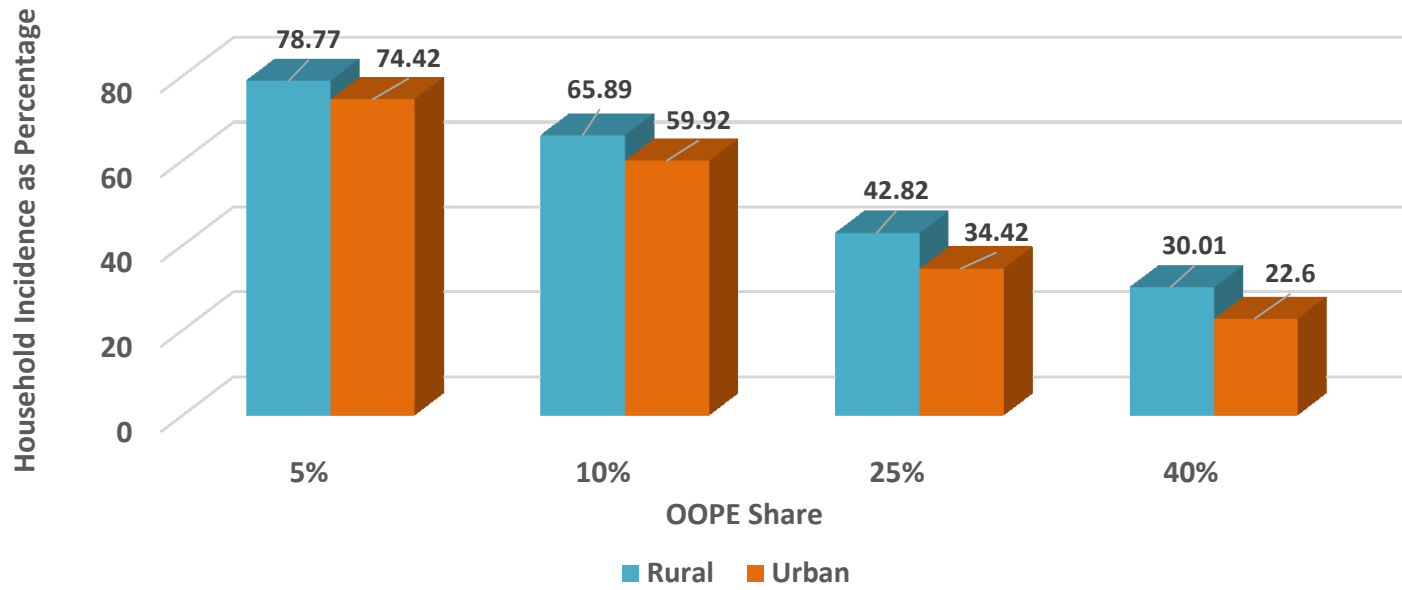

**Fig 3: Proportion of individuals hospitalized with NCDs**

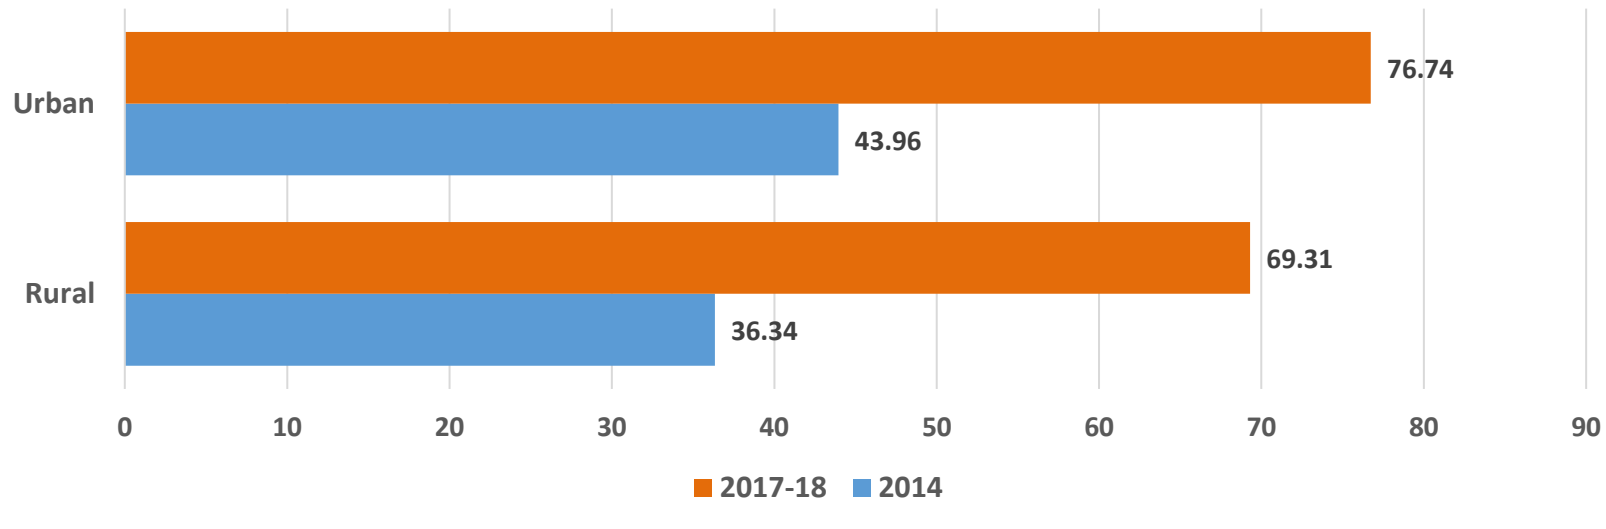

**Fig 4: Medicine access in rural facilities for inpatient care  
Public facilities**

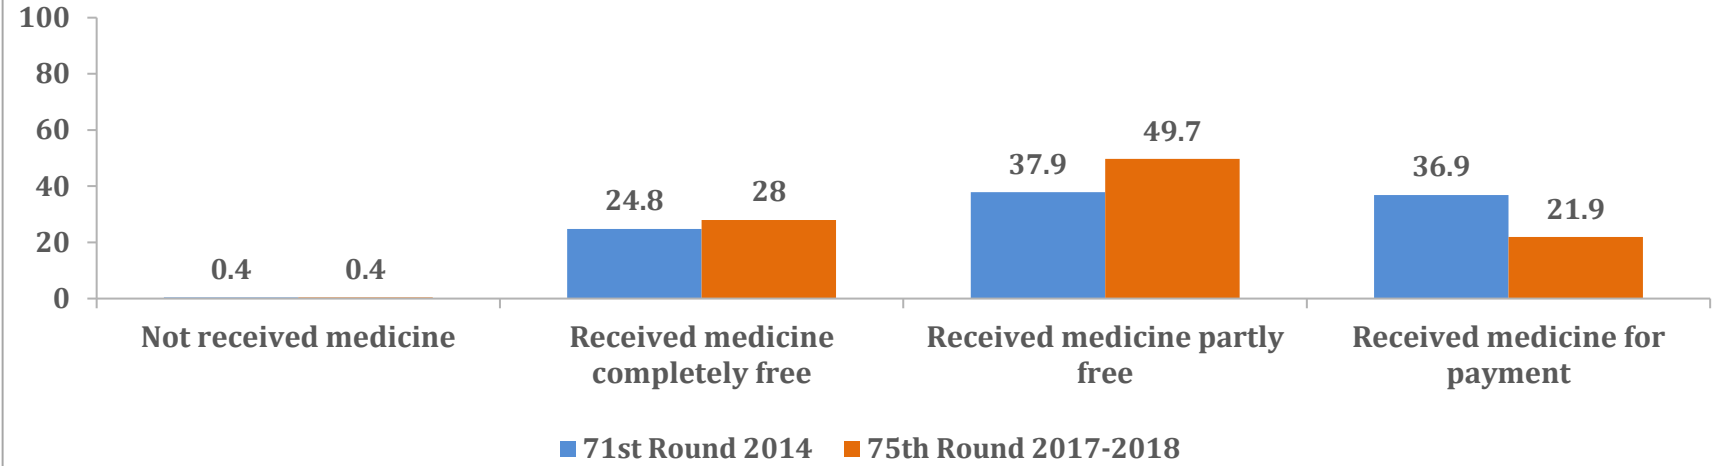

**Fig 5: Medicine access in rural facilities for inpatient care  
Private facilities**

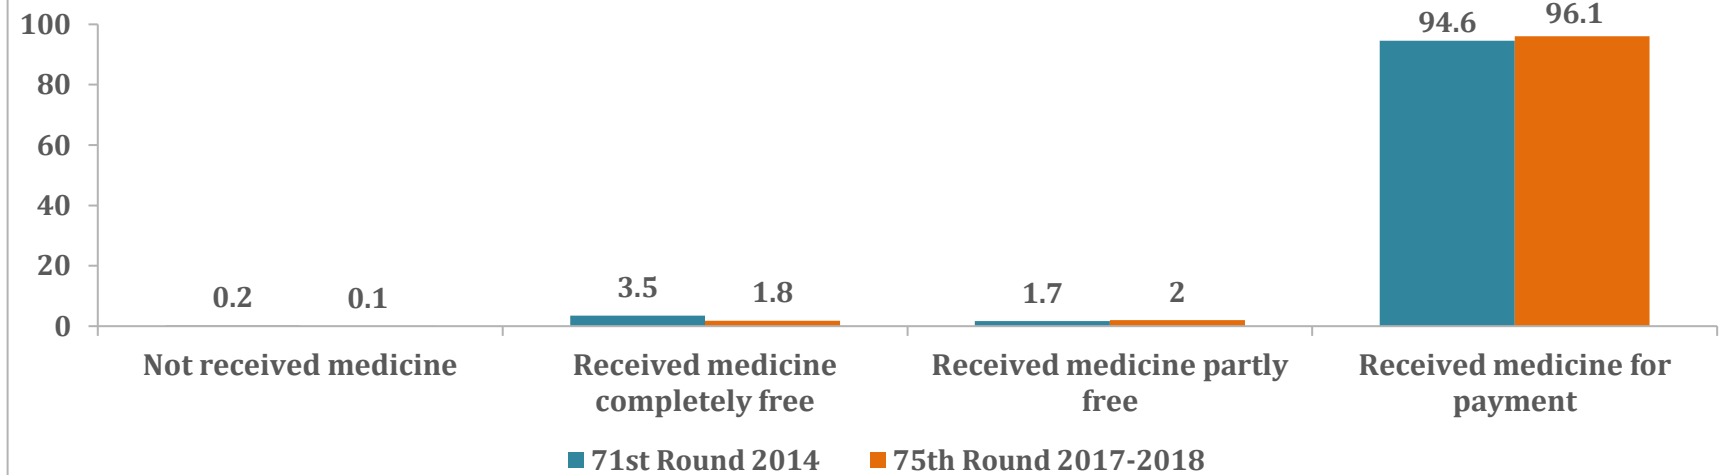

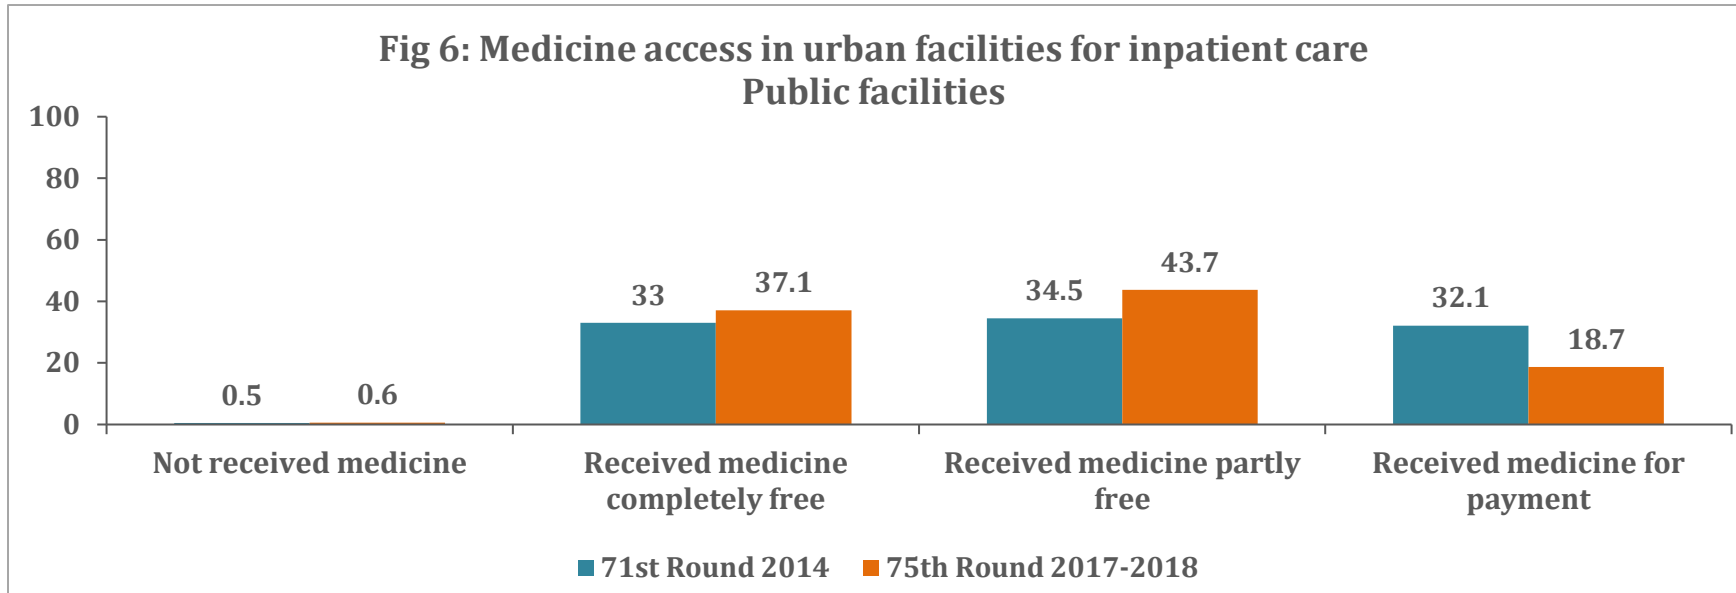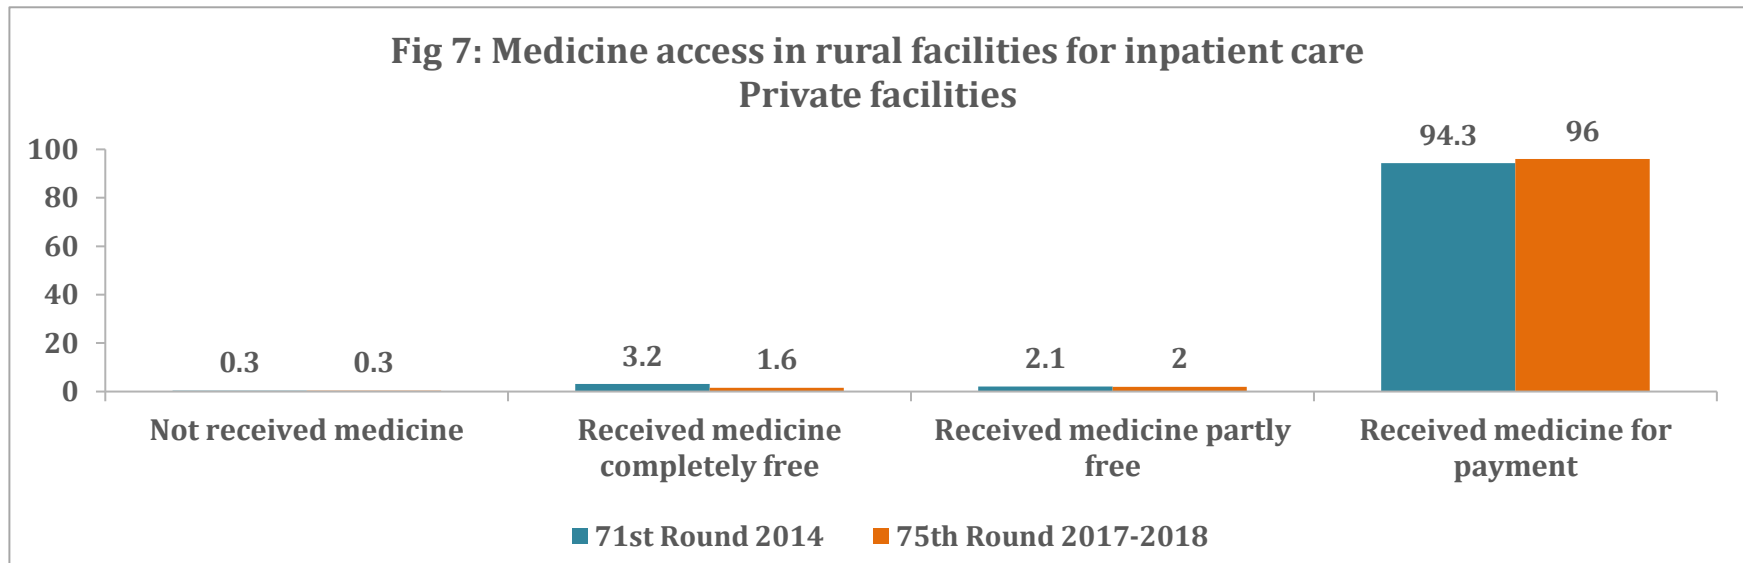

**Fig 8: Incidence of catastrophic health expenditure in outpatient care  
2017-18**

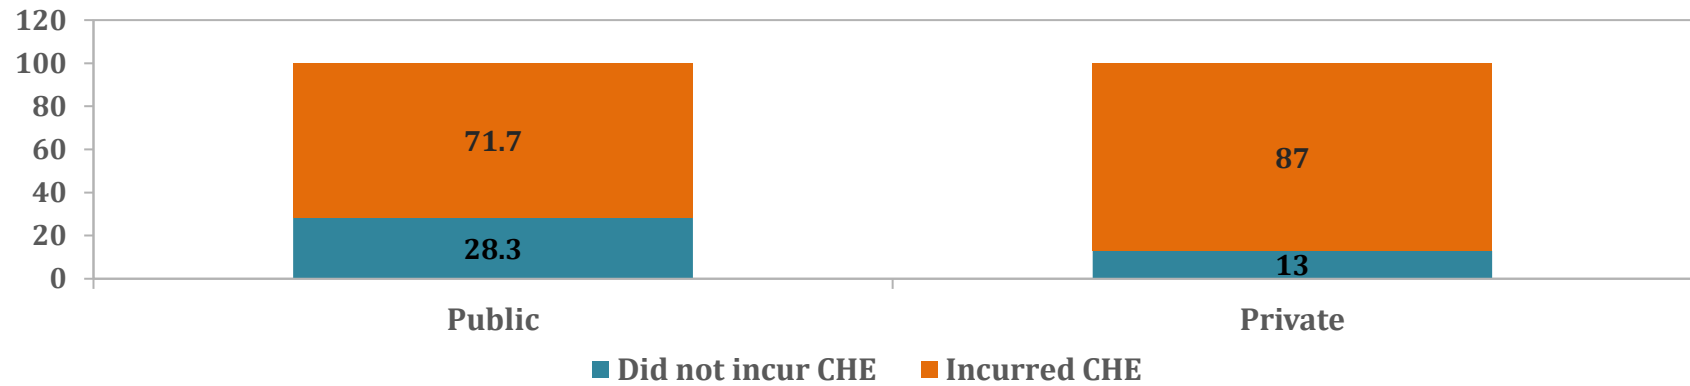

**Fig 9: Access to Non-AYUSH medicines in rural facilities for outpatient care  
Public facilities**

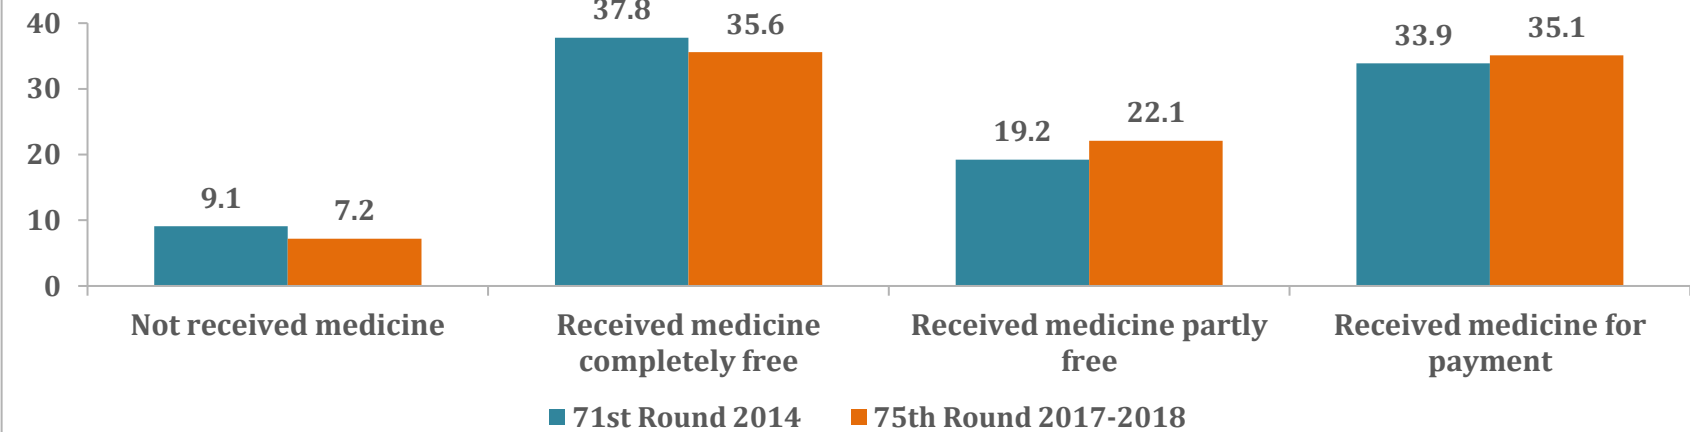

**Fig 10: Access to Non-AYUSH medicines in rural facilities for outpatient care  
Private facilities**

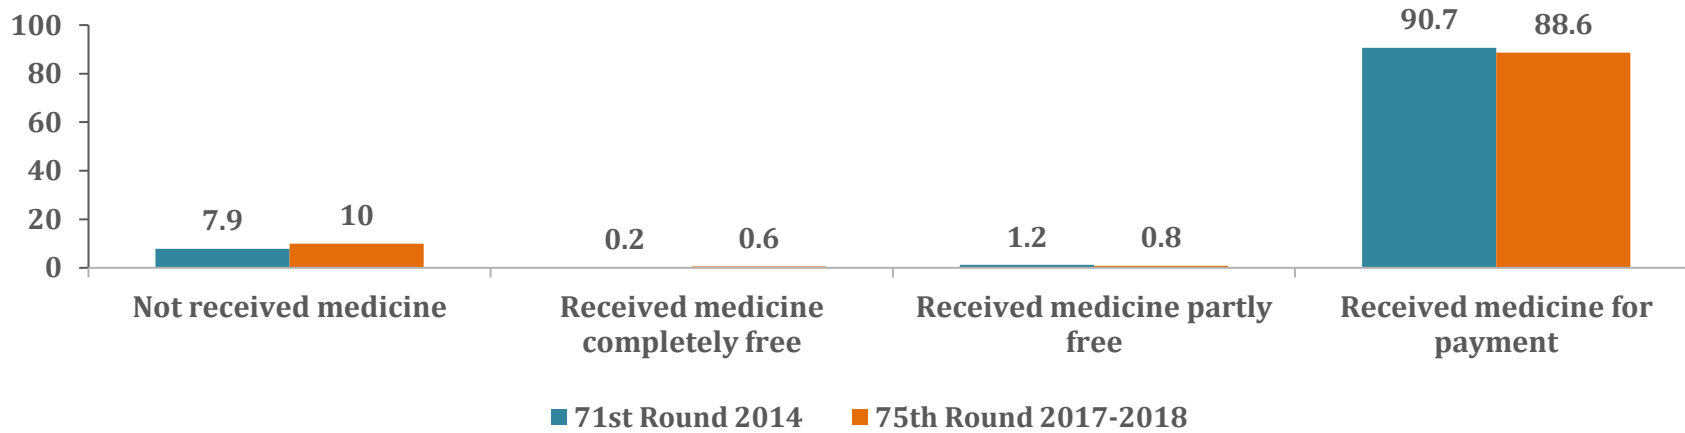

**Fig 11: Access to Non-AYUSH medicines in urban facilities for outpatient care  
Private facilities**

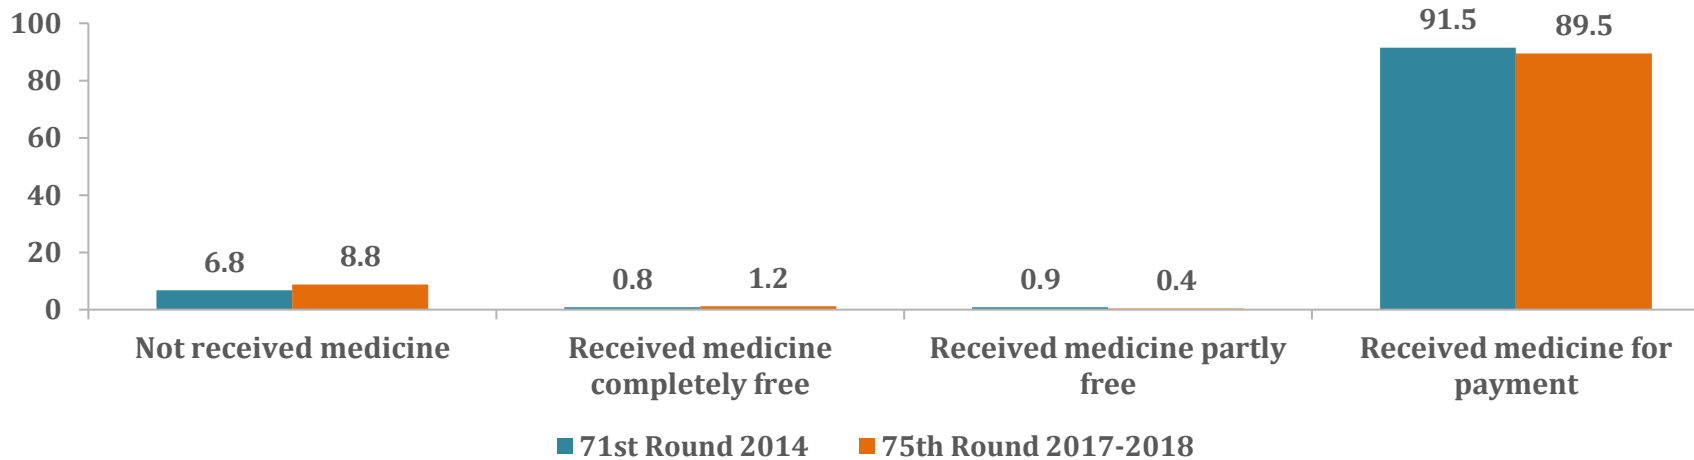

**Fig 12: Access to Non-AYUSH medicines in urban facilities for outpatient care  
Public facilities**

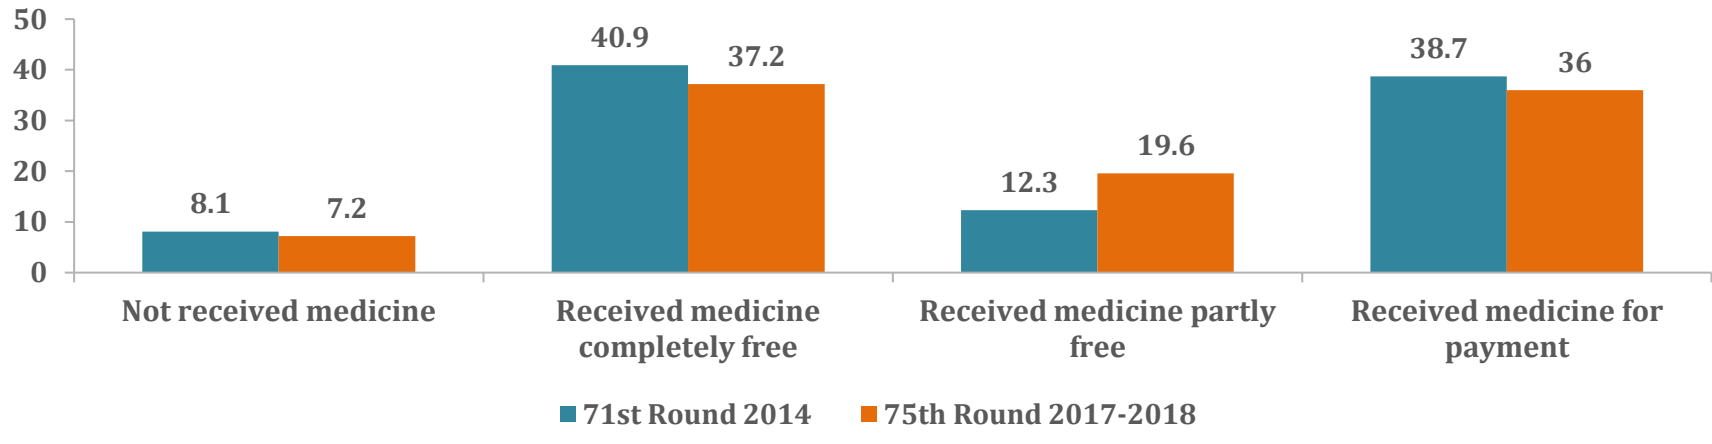

**Fig 13: Access to AYUSH medicines in rural facilities for outpatient care  
Public facilities**

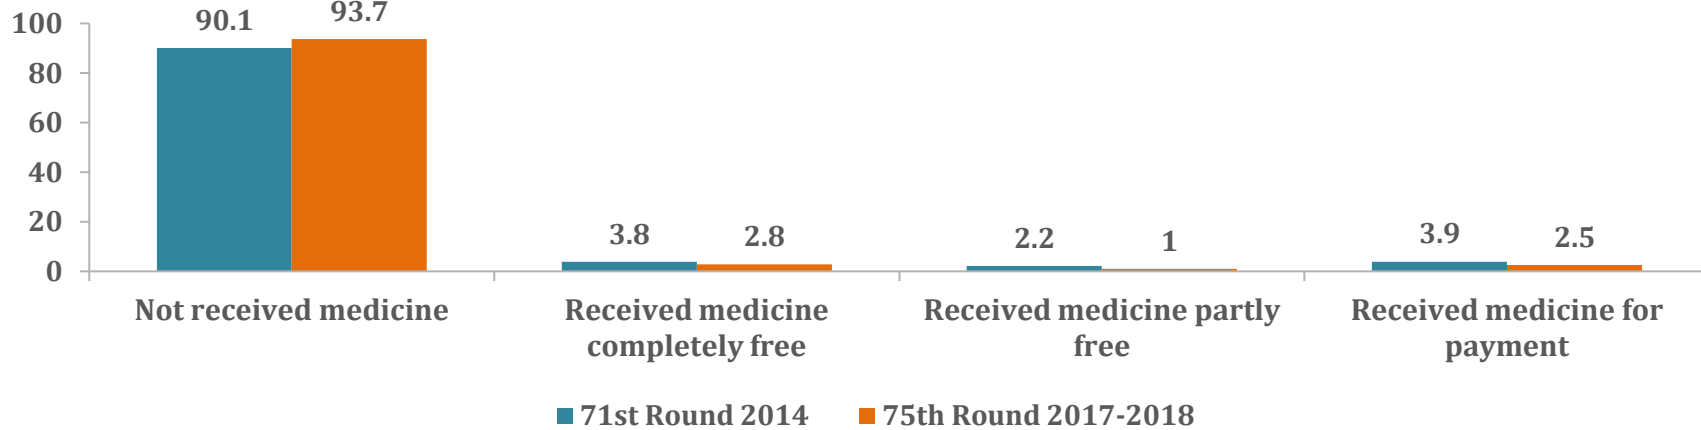



**Fig 14: Access to AYUSH medicines in rural facilities for outpatient care  
Private facilities**

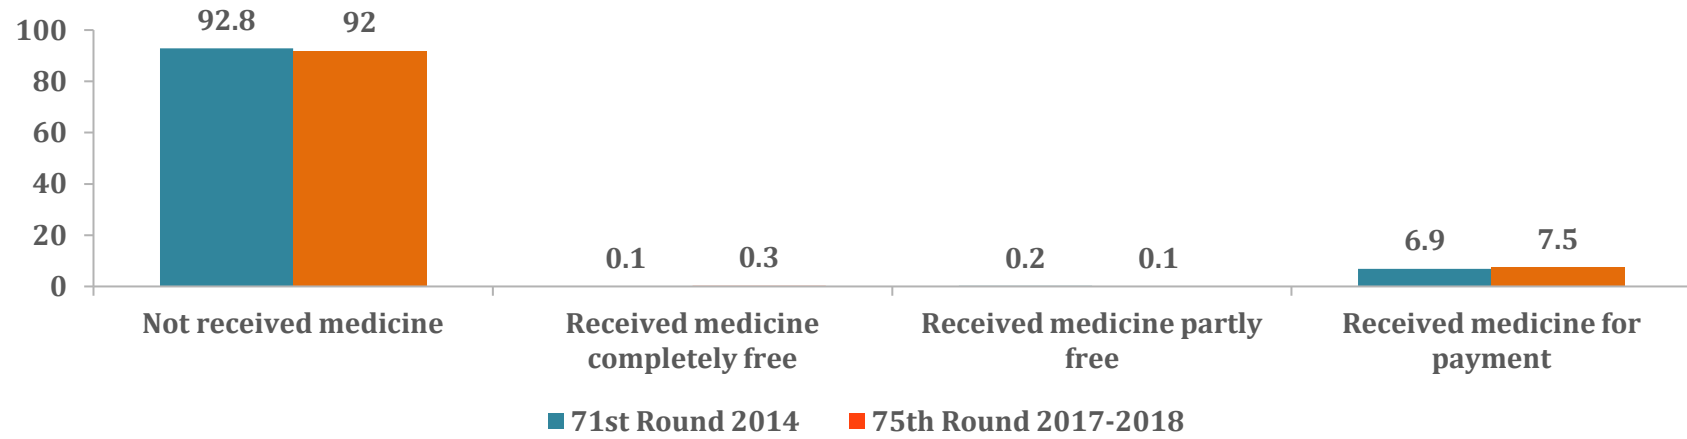

**Fig 15: Access to AYUSH medicines in urban facilities for outpatient care  
Public facilities**

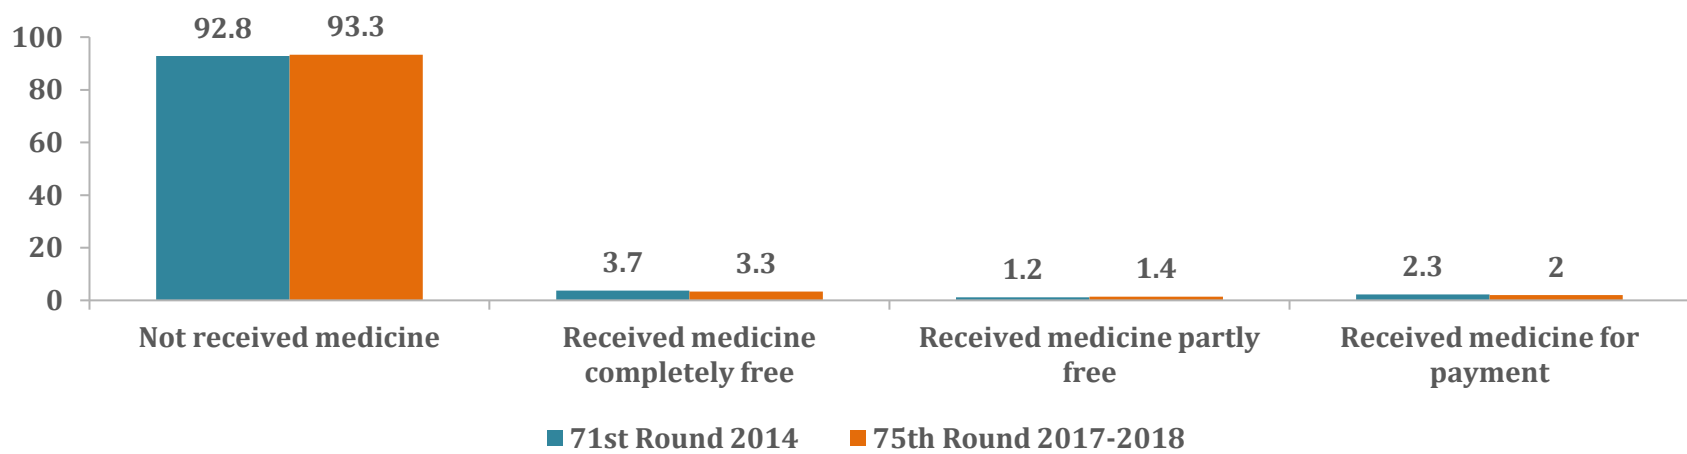

**Fig 16: Access to AYUSH medicines in urban facilities for outpatient care  
Private facilities**

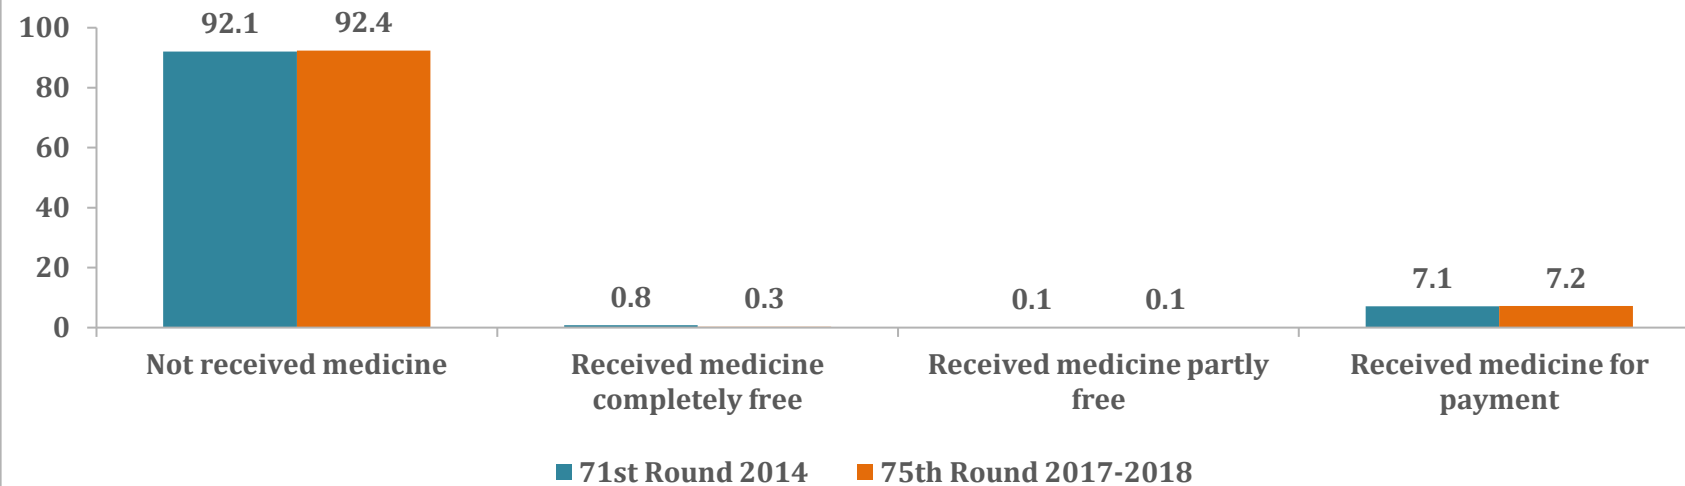

Supplement: MOESM1 [file 19144270]
